# Supplementary material
Source: Elsevier journal article supplement (https://www.sciencedirect.com/science/article/pii/S0211139X1730094X)
Supplement: mmc1 [file S0211139X1730094X:mmc1.docx]

**ANEXO 1. CUESTIONARIOS UTILIZADOS EN EL PROCEDIMIENTO DE PREVENCION Y DETECCIÓN DE MALOS TRATOS FÍSICOS Y ECONÓMICOS A PERSONAS MAYORES**


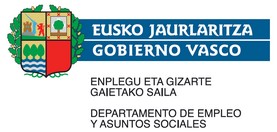


**Cuestionario de prevención y detección de FACTORES DE RIESGO DE MALOS TRATOS físicos y económicos**

| Malos tratos FÍSICOS | | | | | | | | |
| --- | --- | --- | --- | --- | --- | --- | --- | --- |
| FACTORES DE RIESGO QUE PRESENTA  LA PERSONA MAYOR |  | | **SI** | | | **NO** | | **NO SE** |
| Aislamiento o soledad grave no deseada y debilidad de la red social |  | |  | | |  | |  |
| Deterioro cognitivo unido a alteraciones de conducta que dificultan el cuidado y la atención |  | |  | | |  | |  |
| Dependencia física y emocional de la persona mayor respecto del cuidador/a |  | |  | | |  | |  |
| Escasa higiene o ropa inadecuada |  | |  | | |  | |  |
| FACTORES DE RIESGO EN EL ENTORNO  DE LA PERSONA MAYOR |  | | **SI** | | | **NO** | | **NO SE** |
| Mala organización del cuidado (múltiples cuidadores sin coordinación, tiempos sin cuidador…) |  | |  | | |  | |  |
| Episodios actuales o pasados de convivencia conflictiva entre la persona mayor y las personas con quien convive (historia previa de conflicto entre persona mayor y su cuidador/a principal, representantes no elegidos por la persona mayor, evidentes conflictos de intereses o de valores…) |  | |  | | |  | |  |
| El o la cuidadora principal encuentra limitaciones personales para el cuidado de la persona (relacionados con sobrecarga, padecer trastornos psicopatológicos, consumo abusivo de alcohol u otras toxicomanías… |  | |  | | |  | |  |
| Hostilidad de la persona mayor hacia él o la cuidadora o la persona con quien convive y déficit de este en las estrategias del manejo |  | |  | | |  | |  |
| Persona mayor atendida por profesionales desmotivados/as, mal pagados, con bajo salario, burnout… |  | |  | | |  | |  |
| OBSERVACIONES: Otros Riesgos, comentarios respecto a su situación física… |  | | | | | | | |
| Malos tratos ECONÓMICOS | | | | | | | | |
| FACTORES DE RIESGO QUE PRESENTA LA PERSONA MAYOR | |  | | **SI** | **NO** | | **NO SE** | |
| Desconocimiento de su situación económica personal y preocupación por ello | |  | |  |  | |  | |
| Deudas cuando se presupone que tiene capacidad económica suficiente para afrontar sus gastos | |  | |  |  | |  | |
| Donaciones y transmisiones de bienes | |  | |  |  | |  | |
| FACTORES DE RIESGO EN EL ENTORNO DE LA PERSONA MAYOR | |  | | **SI** | **NO** | | **NO SE** | |
| Dependencia muy alta de los recursos económicos de la persona mayor | |  | |  |  | |  | |
| Antecedentes de conflictividad por cuestiones financieras | |  | |  |  | |  | |
| Exagerado interés del o la cuidadora por hacerse cargo de la persona mayor | |  | |  |  | |  | |
| OBSERVACIONES: otros riesgos, comentarios respecto a su situación económica… | |  | | | | | | |


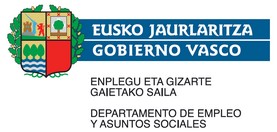


Cuestionario de **DETECCIÓN DE INDICADORES DE MALOS TRATOS físicos y económicos**

**y VALORACIÓN DE LA GRAVEDAD de los mismos**.

| INDICADORES GENERALES | SI | NO | NO LO SÉ |
| --- | --- | --- | --- |
| Deterioro progresivo de la salud sin causa evidente |  |  |  |
| Falta de condiciones de habitabilidad en la vivienda (inseguridad, suciedad, barreras,…), o de otras condiciones o apoyos suficientes para garantizar la cobertura de las necesidades que presenta la persona mayor |  |  |  |
| Miedo, verbalización o quejas de la persona mayor de que no le traten bien, cambio de actitud y/o modo de expresión de la persona mayor en presencia de determinadas personas o cuidadores |  |  |  |
| Obstinación terapéutica y uso desproporcionado de tratamientos y cuidados (servicio de urgencias; abuso de psicofármacos…) |  |  |  |
| Abandono en la atención a las necesidades básicas |  |  |  |
| Abandono de la persona mayor en un servicio socio-sanitario: el hospital, en el servicio social de base, en el ambulatorio… |  |  |  |

| INDICADORES SOCIALES | SI | NO | NO LO SÉ |
| --- | --- | --- | --- |
| Solicitud de alta de un servicio (residencia, URSS…) o reticencia a la actuación profesional en situaciones  de daño o riesgo grave de daño en contra de prescripción sanitaria o social o en contra de su voluntad |  |  |  | |
| Restricciones en el uso del espacio de la vivienda y limitaciones en la relación con el resto de las personas  con las que convive |  |  |  |
| Retirada deliberada de las relaciones sociales y confinamiento injustificado |  |  |  |

| INDICADORES FÍSICOS | SI | NO | NO LO SÉ |
| --- | --- | --- | --- |
| Marcas de sujeción física asociadas al dolor |  |  |  |
| Alopecia parcheada (cuero cabelludo salteado de calvas) |  |  |  |
| Ausencia de respuesta ante tratamiento adecuado (mala evolución de las lesiones  tras la aplicación de las medidas adecuadas) |  |  |  |
| Mal seguimiento de las pautas sanitarias (infra o sobre medicación, retraso en la solicitud  de asistencia , mal seguimiento de dietas y cuidados, etc…) |  |  |  |
| Sujeciones y restricciones físicas sin prescripción ni supervisión |  |  |  |
| Presencia de varios hematomas en diferentes estadios evolutivos sin causa  justificada en zonas de no apoyo |  |  |  |
| Lesiones sin relato que lo justifique ni por parte de la persona mayor ni por el o la cuidadora o  que no haya sido tratada correctamente (caídas no atendidas y/o reiteradas no justificadas) |  |  |  |
| Quemaduras sin causa que lo justifique (cigarrillos, cáusticos, fricción de objetos…) |  |  |  |
| Marcas de ataduras (no sujeciones) |  |  |  |
| Alimentación e hidratación deficiente sin causa justificada |  |  |  |
| Alimentación a la fuerza y con violencia |  |  |  |

| INDICADORES ECONÓMICOS | SI | NO | NO LO SÉ |
| --- | --- | --- | --- |
| En ausencia de deterioro cognitivo, queja de la persona mayor de que le toquen sus objetos personales  sin autorización: desaparición de joyas, etc. |  |  |  |
| Solicitud de incapacitación legal de la persona mayor sin ningún informe médico o psicológico que lo justifique |  |  |  |
| Facturas no pagadas cuando la persona tiene capacidad económica |  |  |  |
| No disponer de elementos básicos cuando tiene capacidad económica |  |  |  |
| Apropiación no autorizada mediante consentimiento viciado de los bienes de la persona mayor |  |  |  |
| Pérdida inexplicable de dinero, cheques, transferencias repentinas a personas ajenas, etc. |  |  |  |
| Cambios en documentos legales y/o financieros: firmas sospechosas; cambios o recientes realizaciones  de testamentos, transmisión de poderes, donaciones, etc., cuando la persona mayor no es capaz de tomar decisiones |  |  |  |
| Concesiones de avales bancarios contra sus propiedades y bienes sin conocer las condiciones y riesgos |  |  |  |
